# Supplementary material for: A fluorescent and colorimetric probe containing oxime-ether for Pd2+ in pure water and living cells
Source: Royal Society of Chemistry journal article supplement (doi:10.1039/c5an02225h), 2015-12-11
Supplement: c5an02225h1.pdf [file c5an02225h1.pdf]

## Supporting Information

### Fluorescent and Colorimetric Probe Containing Oxime-Ether for Pd<sup>2+</sup> in Pure Water and Living Cells

Mian Wang, Yanglei Yuan, Hongmei Wang\* and Zhaohai Qin\*

*Department of Chemistry, China Agricultural University, Beijing 100193, P. R. China.*

Corresponding author. Tel: +86 10 62736957; Fax: +86 10 62736777; E-mail: [whmd@cau.edu.cn](mailto:whmd@cau.edu.cn) and

[qinzhaohai@263.net](mailto:qinzhaohai@263.net)

### Table of Contents

|          |                                                                                                                                                                                                                                                                                             |
|----------|---------------------------------------------------------------------------------------------------------------------------------------------------------------------------------------------------------------------------------------------------------------------------------------------|
| Page 1   | Contents                                                                                                                                                                                                                                                                                    |
| Page 2   | Synthesis procedure of compound <b>1</b> .                                                                                                                                                                                                                                                  |
| Page 3-5 | <b>Fig. S1</b> <sup>1</sup> H NMR (a), <sup>13</sup> C NMR (b) and HRMS (c) spectra of <b>1</b> . <sup>1</sup> H NMR (d, e) and HRMS (f) spectra of <b>1</b> + Pd <sup>2+</sup> .                                                                                                           |
| Page 6   | <b>Fig. S2</b> The percentage decline in fluorescence intensity at 505 nm of <b>1</b> (10.0 μM) in water solution in response to the presence of Pd <sup>2+</sup> (0.0 to 1.5 equiv.).                                                                                                      |
|          | <b>Fig. S3</b> Changes in absorption at 435 nm and 478 nm of a water solution of <b>1</b> (10.0 μM) in response to the presence of Pd <sup>2+</sup> (0.0 to 1.2 equiv.).                                                                                                                    |
|          | <b>Fig. S4</b> Time-dependent fluorescence intensity changes at 505 nm upon addition of 1.0 equiv. of Pd <sup>2+</sup> in a water solution of <b>1</b> (10.0 μM).                                                                                                                           |
| Page 7   | <b>Fig. S5</b> Fluorescence intensity of <b>1</b> (10.0 μM) at 505 nm in water solution under different pH and further addition of 1.0 equiv. of Pd <sup>2+</sup> .                                                                                                                         |
|          | <b>Fig. S6</b> Fluorescence images of <b>1</b> (10.0 μM) in water solution after addition of various cations and those after further addition of 1.0 equiv. of Pd <sup>2+</sup> (expect Pd <sup>2+</sup> ).                                                                                 |
|          | <b>Fig. S7</b> Color changes of <b>1</b> (10.0 μM) in water solution after addition of various cations and those after further addition of 1.0 equiv. of Pd <sup>2+</sup> (expect Pd <sup>2+</sup> ).                                                                                       |
| Page 8   | <b>Fig. S8</b> Fluorescence spectra changes of <b>1</b> (10 μM) in actual water samples (a: surface water, b: underground water) after addition of 2.0 equiv. of Pd <sup>2+</sup> .                                                                                                         |
|          | <b>Fig. S9</b> Fluorescence spectra of <b>1</b> (10 μM) in water solution after addition of 1.0 equiv. of Pd <sup>2+</sup> and further addition of 4.0 equiv. of S <sup>2-</sup> and Job's plot of <b>1</b> with Pd <sup>2+</sup> obtained by UV-Vis and fluorescence emission measurements |
|          | <b>Fig. S10</b> Cytotoxicity assays of <b>1</b> at different concentrations for Hela cells.                                                                                                                                                                                                 |

Compound **3** (0.2 g, 0.82 m mol) was dissolved in 10mL EtOH, then K<sub>2</sub>CO<sub>3</sub> (0.34 g, 2.5 m mol) and hydroxylamine hydrochloride (0.17 g, 2.4mmol) were added. The mixture was stirred at room temperature for 2 hours and then poured into 50 mL water and extracted with 50 mL EtOAc. After washed with 50mL saturated brine, dried over anhydrous Na<sub>2</sub>SO<sub>4</sub>, the organic layer was evaporated to give 0.2 g yellow solid in 94 % yield, which was used in the next step without any characterization and purification.

**Synthesis of compound 1:**

A mixture of compound **2** (0.2 g, 0.77 mmol) , K<sub>2</sub>CO<sub>3</sub> (0.33 g, 2.2mmol) and 2-(chloromethyl)pyridine hydrochloride (0.12 g, 0.94 mmol) in 20 mL MeCN was heated under reflux for 3 hours. When the mixture was cooled to room temperature, it was poured into 50 water and extracted with 50 mL EtOAc. After washed with 50 mL saturated brine, dried over anhydrous Na<sub>2</sub>SO<sub>4</sub>, the organic layer was evaporated and the crude residue was purified by flash chromatography using CH<sub>2</sub>Cl<sub>2</sub> as an eluent to give 0.16 g yellow solid in 68 % yield. <sup>1</sup>H NMR (300 MHz, CDCl<sub>3</sub>) δ 8.61 (d, J = 4.9 Hz, 1H), 8.42 (s, 1H), 8.08 (s, 1H), 7.73 (td, J = 7.7, 1.8 Hz, 1H), 7.45 (d, J = 7.8 Hz, 1H), 7.31 (dd, J = 8.8, 5.7 Hz, 1H), 7.23 (dd, J = 7.0, 5.5 Hz, 1H), 6.59 (dd, J = 8.9, 2.5 Hz, 1H), 6.49 (d, J = 2.4 Hz, 1H), 5.35 (s, 2H), 3.44 (q, J = 7.1 Hz, 4H), 1.23 (t, J = 7.1 Hz, 6H). <sup>13</sup>C NMR (75 MHz, CDCl<sub>3</sub>) δ 161.08, 158.15, 156.92, 151.34, 149.00, 144.85, 138.99, 136.63, 129.92, 122.39, 121.75, 111.53, 109.34, 108.41, 97.16, 76.71, 44.87, 12.39. HRMS calcd for C<sub>20</sub>H<sub>21</sub>N<sub>3</sub>O<sub>3</sub>: [M + H<sup>+</sup>] 352.1660, found 352.1656. MP: 176-177 °C.

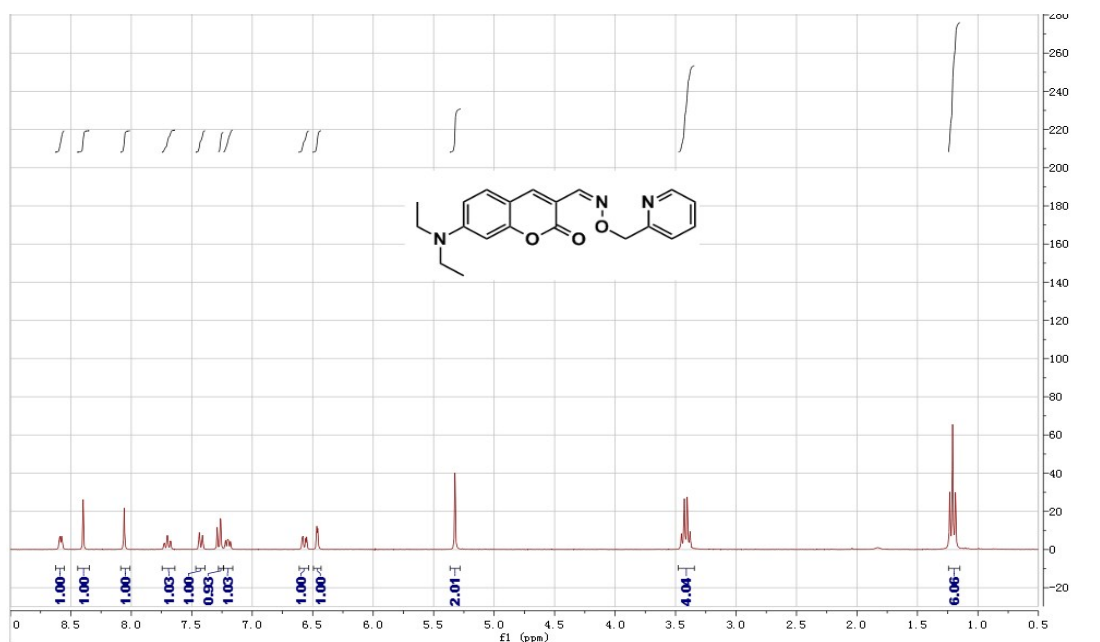

(b)

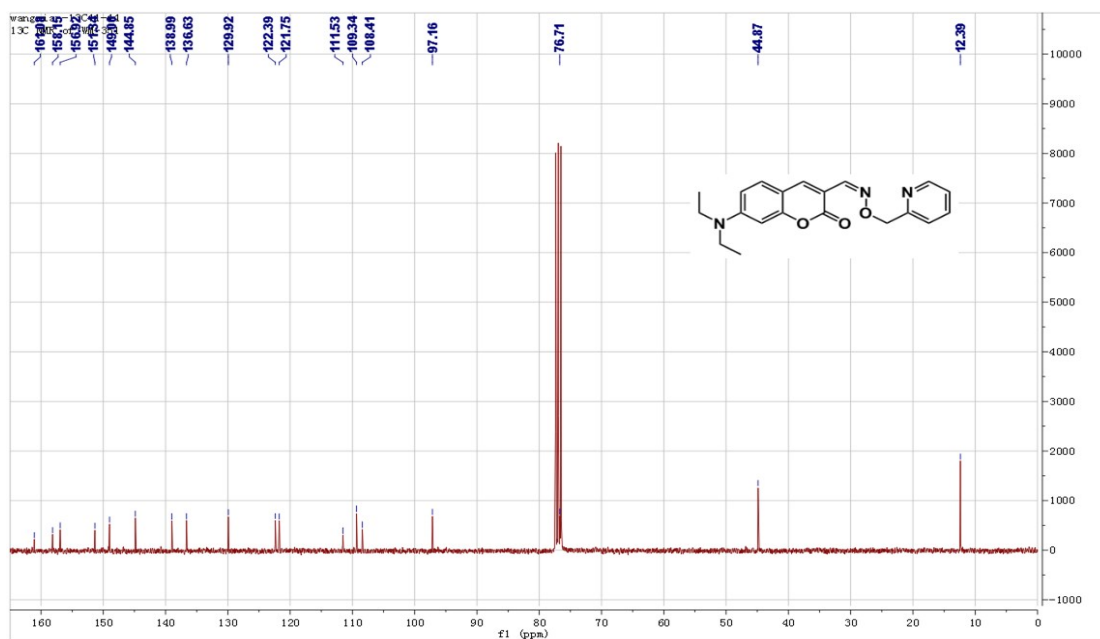

(c)

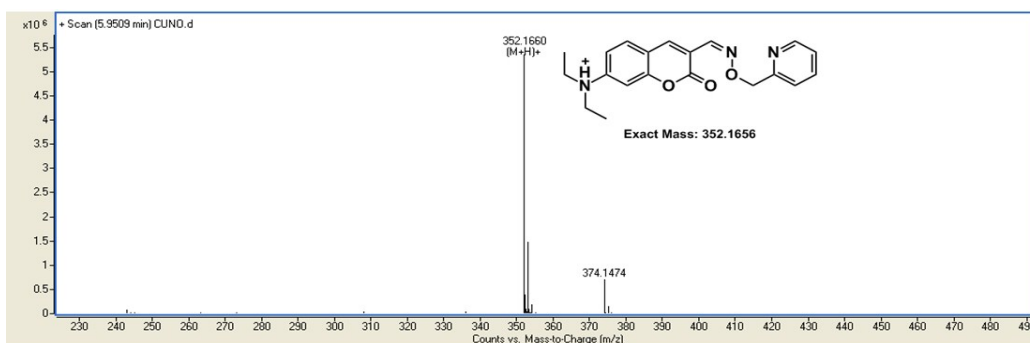

(d)

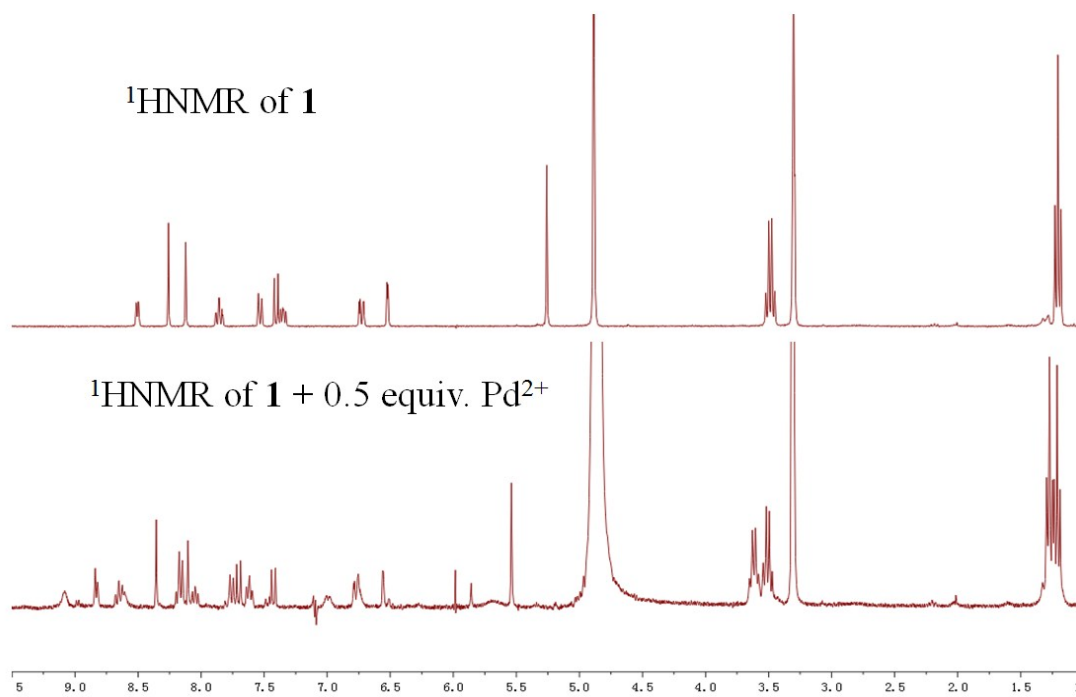

(e)

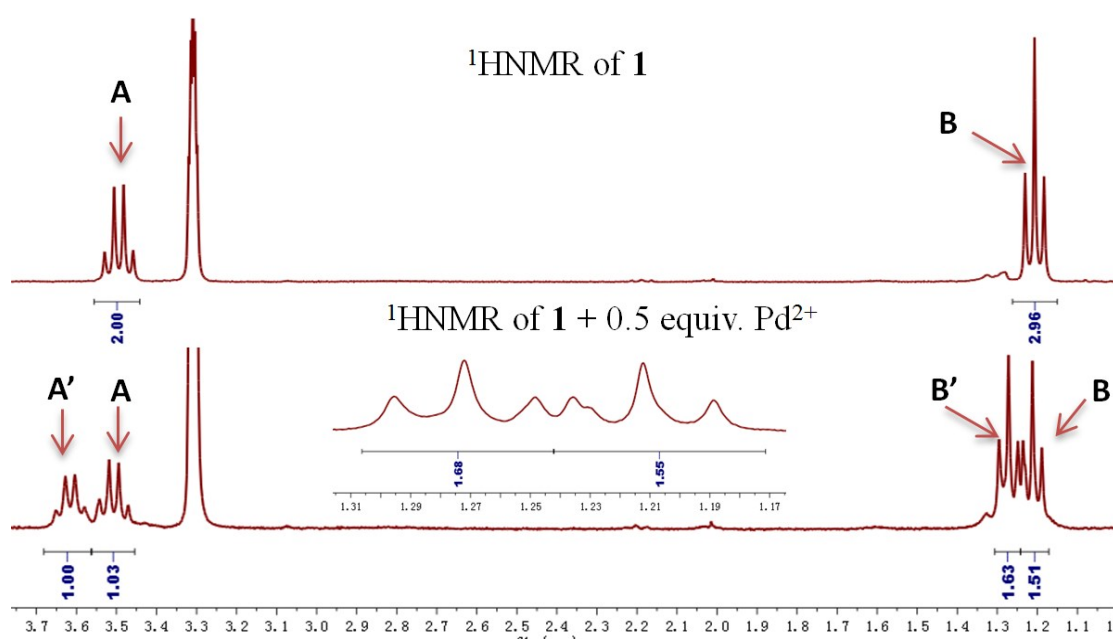

(f)

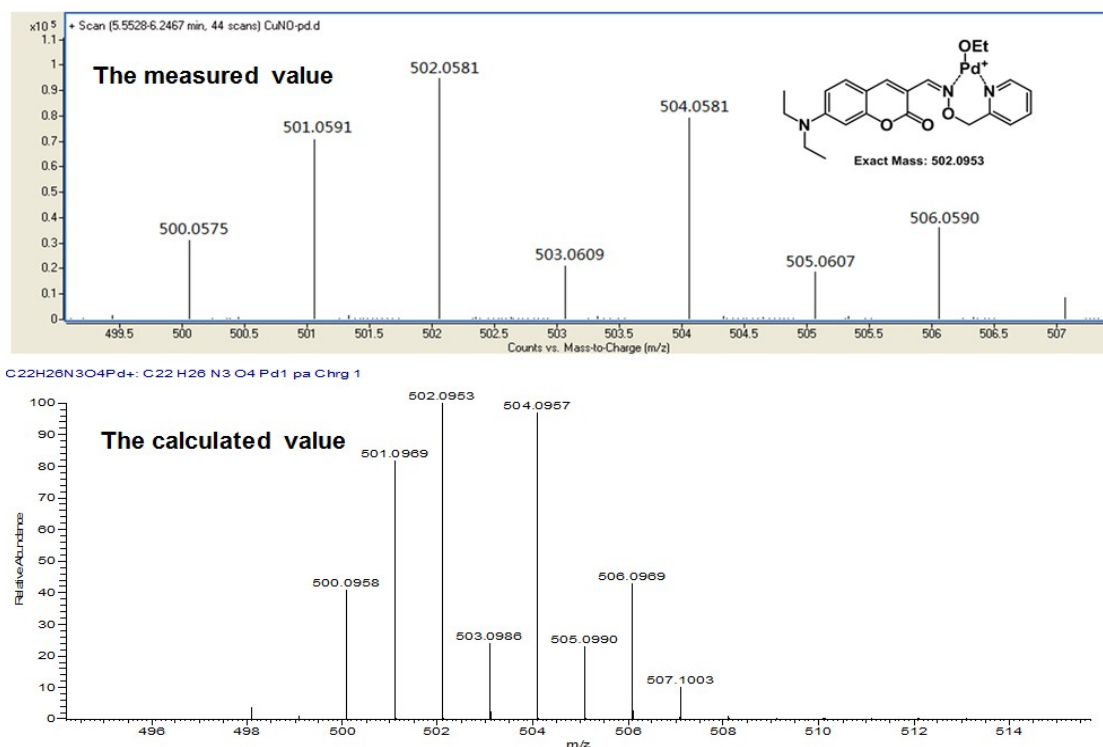

**Fig. S1**  $^1\text{H}$  NMR (a),  $^{13}\text{C}$  NMR (b) and HRMS (c) spectra of **1**.  $^1\text{H}$  NMR (d, e) and HRMS (f) spectra of **1** +  $\text{Pd}^{2+}$ .

In Figure (e), peak A and peak B represent a methylene group and a methyl group of **1** respectively, peak A' and peak B' represent a methylene group and a methyl group of **1**- $\text{Pd}^{2+}$ .

As showed in Figure (d), When the  $\text{CD}_3\text{OD}$  solution of **1** was added by 0.5 equiv. of  $\text{Pd}^{2+}$ , Compared to the  $\text{CD}_3\text{OD}$  solution of **1** without  $\text{Pd}^{2+}$ , there are more peaks in the  $^1\text{H}$ NMR spectrum of **1** + 0.5 equiv.  $\text{Pd}^{2+}$ . Owing to electron withdrawing effect of metal ions, there are some peaks move downfield direction in the  $^1\text{H}$ NMR spectrum of **1** + 0.5 equiv.  $\text{Pd}^{2+}$ . Finally, as showed in Figure (e), the integration results show that the molar amount of **1** and **1**- $\text{Pd}^{2+}$  is approximately 1: 1 when 0.5 equiv.  $\text{Pd}^{2+}$  was added to a  $\text{CD}_3\text{OD}$  solution of **1**. In Figure (e), the measured and calculated HRMS spectra show that **1** and  $\text{Pd}^{2+}$  can form a 1: 1 coordination compound.

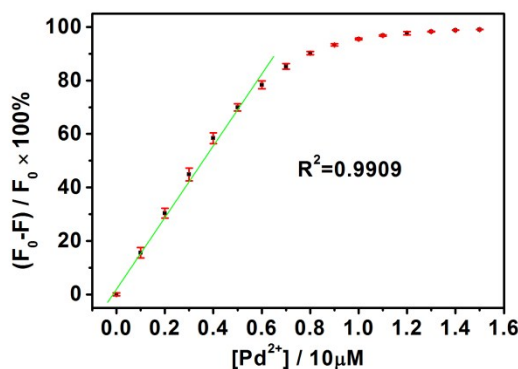

**Fig. S2** The percentage decline in fluorescence intensity at 505 nm of **1** (10.0  $\mu$  M) in water solution in response to the presence of  $\text{Pd}^{2+}$  (0.0 to 1.5 equiv.),  $\lambda_{\text{ex}} = 435$  nm,  $F_0$ : the fluorescence intensity at 505 nm of **1** without  $\text{Pd}^{2+}$ ,  $F$ : the fluorescence intensity at 505 nm of **1** in response to the presence of  $\text{Pd}^{2+}$ . Data are expressed as the mean  $\pm 2\sigma$  (“ $\sigma$ ” represents the standard deviation of three sets of parallel experiments). The detection limit of **1** for  $\text{Pd}^{2+}$  is calculated according to the equation:  $\text{LOD} = 3\sigma/S$  (“LOD” represents limit of detection, “ $\sigma$ ” represents the standard deviation of the 11 blank samples, “S” represents the slope of the linear fitting, In our experiments,  $\sigma = 2.568 \times 10^{-3}$ ,  $S = 1.408 \times 10^5$ ,  $\text{LOD} = 3 \times 2.568 \times 10^{-3} / 1.408 \times 10^5 = 5.5 \times 10^{-8}$  M).

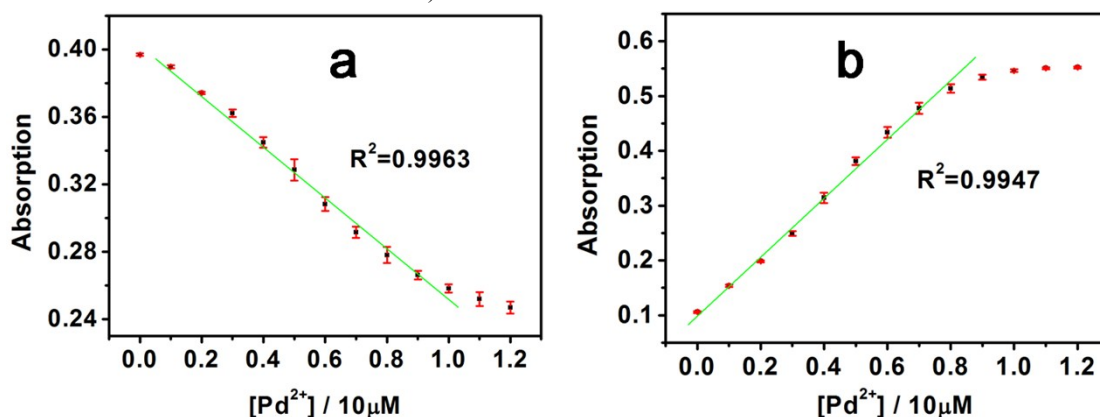

**Fig. S3** (a) Changes in absorption at 435 nm of a water solution of **1** (10.0  $\mu$  M) in response to the presence of  $\text{Pd}^{2+}$  (0.0 to 1.2 equiv.). (b) Changes in absorption at 478 nm of a water solution of **1** (10.0  $\mu$  M) in response to the presence of  $\text{Pd}^{2+}$  (0.0 to 1.2 equiv.). Data are expressed as the mean  $\pm 2\sigma$  (“ $\sigma$ ” represents the standard deviation of three sets of parallel experiments).

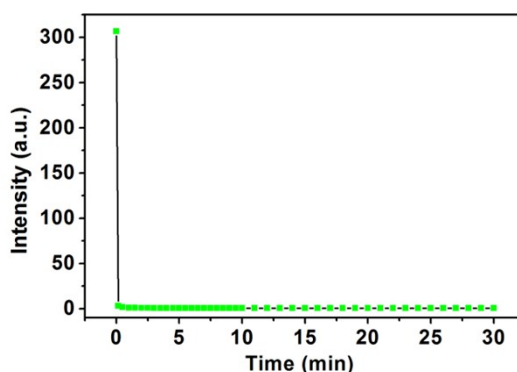

**Fig. S4** Time-dependent fluorescence intensity changes at 505 nm upon addition of 1.0 equiv. of  $\text{Pd}^{2+}$  in a water solution of **1** (10.0  $\mu$  M).  $\lambda_{\text{ex}} = 435$  nm.

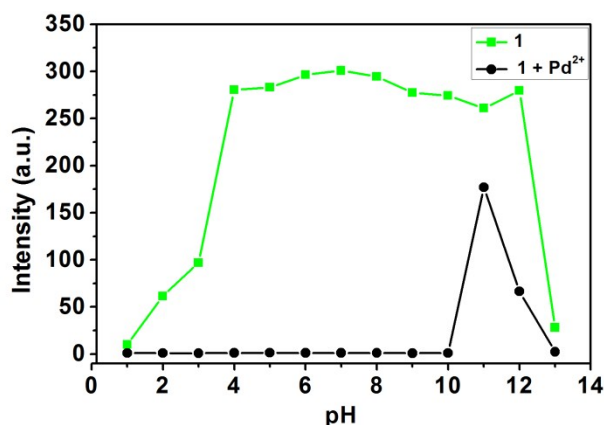

**Fig. S5** Fluorescence intensity of **1** (10.0  $\mu$  M) at 505 nm in water solution under different pH (■) and further addition of 1.0 equiv. of Pd<sup>2+</sup> (●) (pH value of the solution was adjusted by HClO<sub>4</sub> or NaOH),  $\lambda_{\text{ex}}$  = 435 nm.

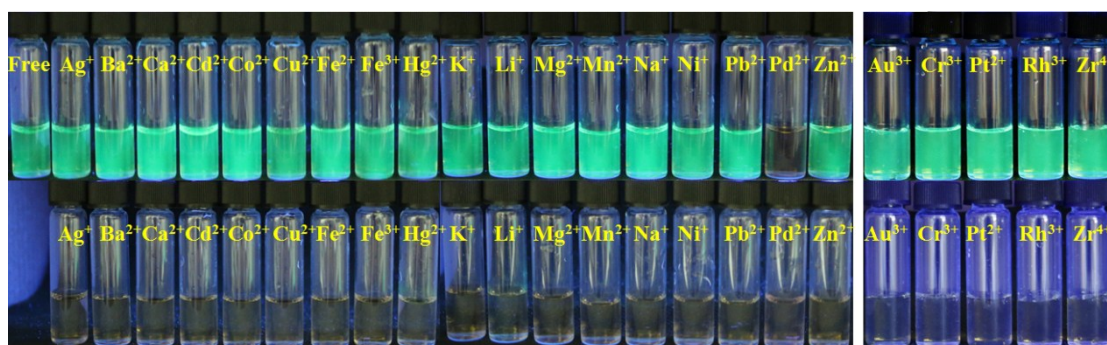

**Fig. S6** Fluorescence images of **1** (10.0  $\mu$  M) in water solution after addition of various cations and those after further addition of 1.0 equiv. of Pd<sup>2+</sup> (expect Pd<sup>2+</sup>). Au<sup>3+</sup> and Cu<sup>2+</sup> were added by 2.5 equiv., other competing cations including Ag<sup>+</sup>, Ba<sup>2+</sup>, Ca<sup>2+</sup>, Cd<sup>2+</sup>, Co<sup>2+</sup>, Cr<sup>3+</sup>, Fe<sup>2+</sup>, Fe<sup>3+</sup>, Hg<sup>2+</sup>, K<sup>+</sup>, Li<sup>+</sup>, Mg<sup>2+</sup>, Mn<sup>2+</sup>, Na<sup>+</sup>, Ni<sup>+</sup>, Pb<sup>2+</sup>, Pt<sup>2+</sup>, Rh<sup>3+</sup>, Zn<sup>2+</sup>, Zr<sup>4+</sup> were added by 5.0 equiv.

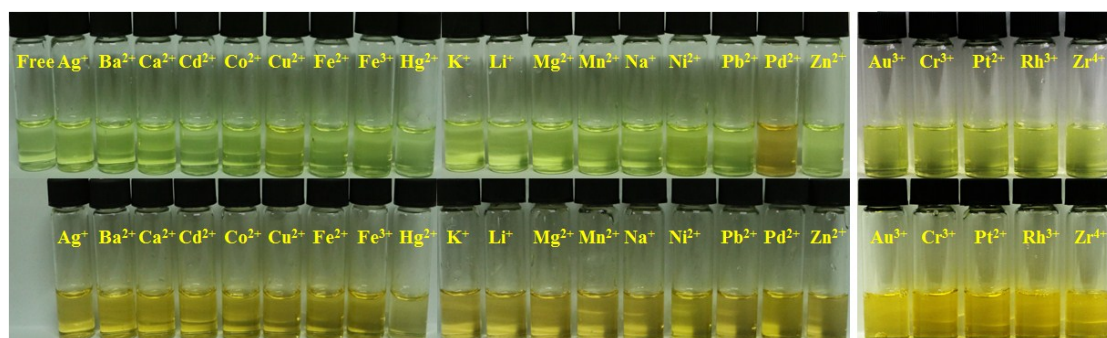

**Fig. S7** Color changes of **1** (10.0  $\mu$  M) in water solution after addition of various cations and those after further addition of 1.0 equiv. of Pd<sup>2+</sup> (expect Pd<sup>2+</sup>). Au<sup>3+</sup> and Cu<sup>2+</sup> were added by 2.5 equiv., other competing cations including Ag<sup>+</sup>, Ba<sup>2+</sup>, Ca<sup>2+</sup>, Cd<sup>2+</sup>, Co<sup>2+</sup>, Cr<sup>3+</sup>, Fe<sup>2+</sup>, Fe<sup>3+</sup>, Hg<sup>2+</sup>, K<sup>+</sup>, Li<sup>+</sup>, Mg<sup>2+</sup>, Mn<sup>2+</sup>, Na<sup>+</sup>, Ni<sup>+</sup>, Pb<sup>2+</sup>, Pt<sup>2+</sup>, Rh<sup>3+</sup>, Zn<sup>2+</sup>, Zr<sup>4+</sup> were added by 5.0 equiv.

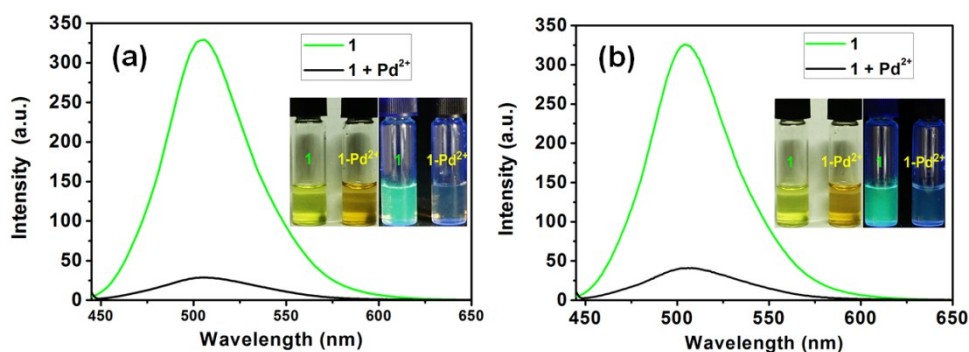

**Fig. S8** Fluorescence spectra of **1** ( $10\ \mu\text{M}$ ) in actual water samples (a: surface water, b: underground water) after addition of 2.0 equiv. of  $\text{Pd}^{2+}$ ,  $\lambda_{\text{ex}} = 435\ \text{nm}$ . Inset: fluorescence and color images of **1** ( $10\ \mu\text{M}$ ) in actual water samples and those after further addition of 2.0 equiv. of  $\text{Pd}^{2+}$ . (Surface water samples from Fuhai in The Old Summer Palace, underground water from water well in China Agricultural University)

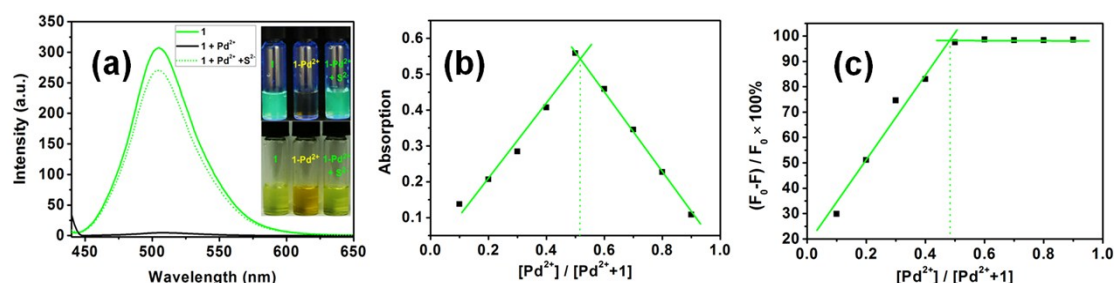

**Fig. S9** (a) Fluorescence spectra of **1** ( $10\ \mu\text{M}$ ) in water solution after addition of 1.0 equiv. of  $\text{Pd}^{2+}$  and further addition of 4.0 equiv. of  $\text{S}^{2-}$ ,  $\lambda_{\text{ex}} = 435\ \text{nm}$ . Inset: fluorescence and color images of **1**, **1** +  $\text{Pd}^{2+}$  and **1** +  $\text{Pd}^{2+}$  +  $\text{S}^{2-}$ . (b) Job's plot of **1** with  $\text{Pd}^{2+}$  obtained by UV-Vis measurements ( $\lambda = 478\ \text{nm}$ ), the total concentration of **1** and  $\text{Pd}^{2+}$  is  $20\ \mu\text{M}$ . (c) Job's plot of **1** with  $\text{Pd}^{2+}$  obtained by fluorescence emission measurements, the total concentration of **1** and  $\text{Pd}^{2+}$  is  $20\ \mu\text{M}$ .  $\lambda_{\text{ex}} = 435\ \text{nm}$ ,  $F_0$ : the fluorescence intensity at 505 nm of **1** without  $\text{Pd}^{2+}$ ,  $F$ : the fluorescence intensity at 505 nm of **1** in response to the presence of  $\text{Pd}^{2+}$ .

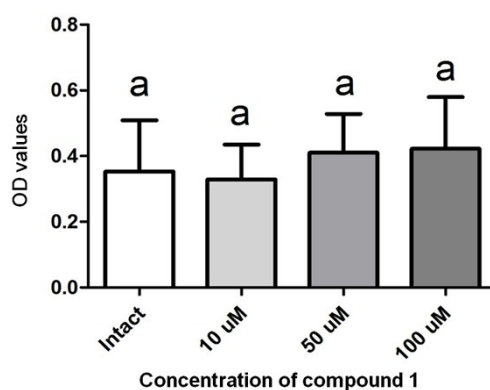

**Fig. S10** Cytotoxicity assays of **1** at different concentrations ( $0\ \mu\text{M}$ ,  $10\ \mu\text{M}$ ,  $50\ \mu\text{M}$ ,  $100\ \mu\text{M}$ ) for HeLa cells, values are means +  $2\sigma$  ( $n=3$ ),  $p > 0.05$ . The results show that compared to the control group, the effect of **1** on the cells had no significant difference, even the concentration of **1** is 10 times the concentration of intracellular fluorescence imaging experiment.
